# Supplementary material
Source: PubMed Central journal article supplement (PMC2438401)
Supplement: 0803732105_Supplemental_PDF.pdf [file 0803732105_Supplemental_PDF.pdf]

# Supporting Information

Bourgeois *et al.* 10.1073/pnas.0803732105

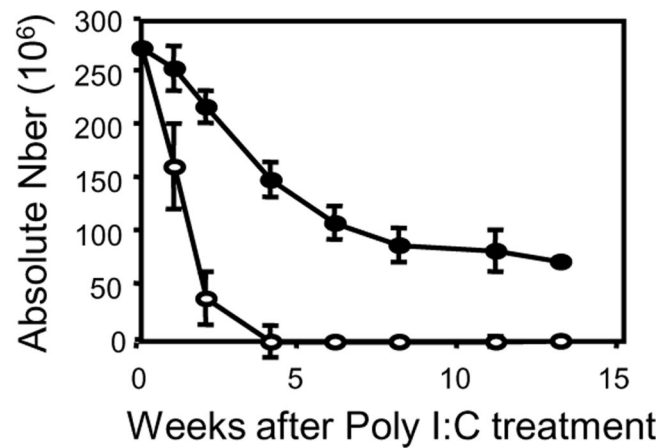

**Fig. S1.** Kinetics of thymocytes depletion in young adult mice. Absolute cell numbers of double positive (DP) thymocytes after poly(I:C) treatment of 4- to 6-week-old MxCre<sup>-</sup> Rag2 fl/- (filled symbols) or MxCre<sup>+</sup> Rag2 fl/- (open symbols).
